# Supplementary material
Source: publisher figshare collection journal article supplement (https://karger.figshare.com/ndownloader/files/35067790)
Supplement: Supplementary file 1 [file 35067790]

**Video Legends**

**Supplementary Video 1. Pharyngeal phase of swallowing**

On admission, the swallowing function was evaluated. Although the purple jelly is on the epiglottis, the epiglottis could not be tilted, and the pharynx constrictors do not constrict well.
